# Supplementary material for: Norovirus Changes Susceptibility to Type 1 Diabetes by Altering Intestinal Microbiota and Immune Cell Functions
Source: PubMed Central journal article supplement (PMC6863139; doi:10.3389/fimmu.2019.02654), 2019-11-12

### Supplementary Figure 9

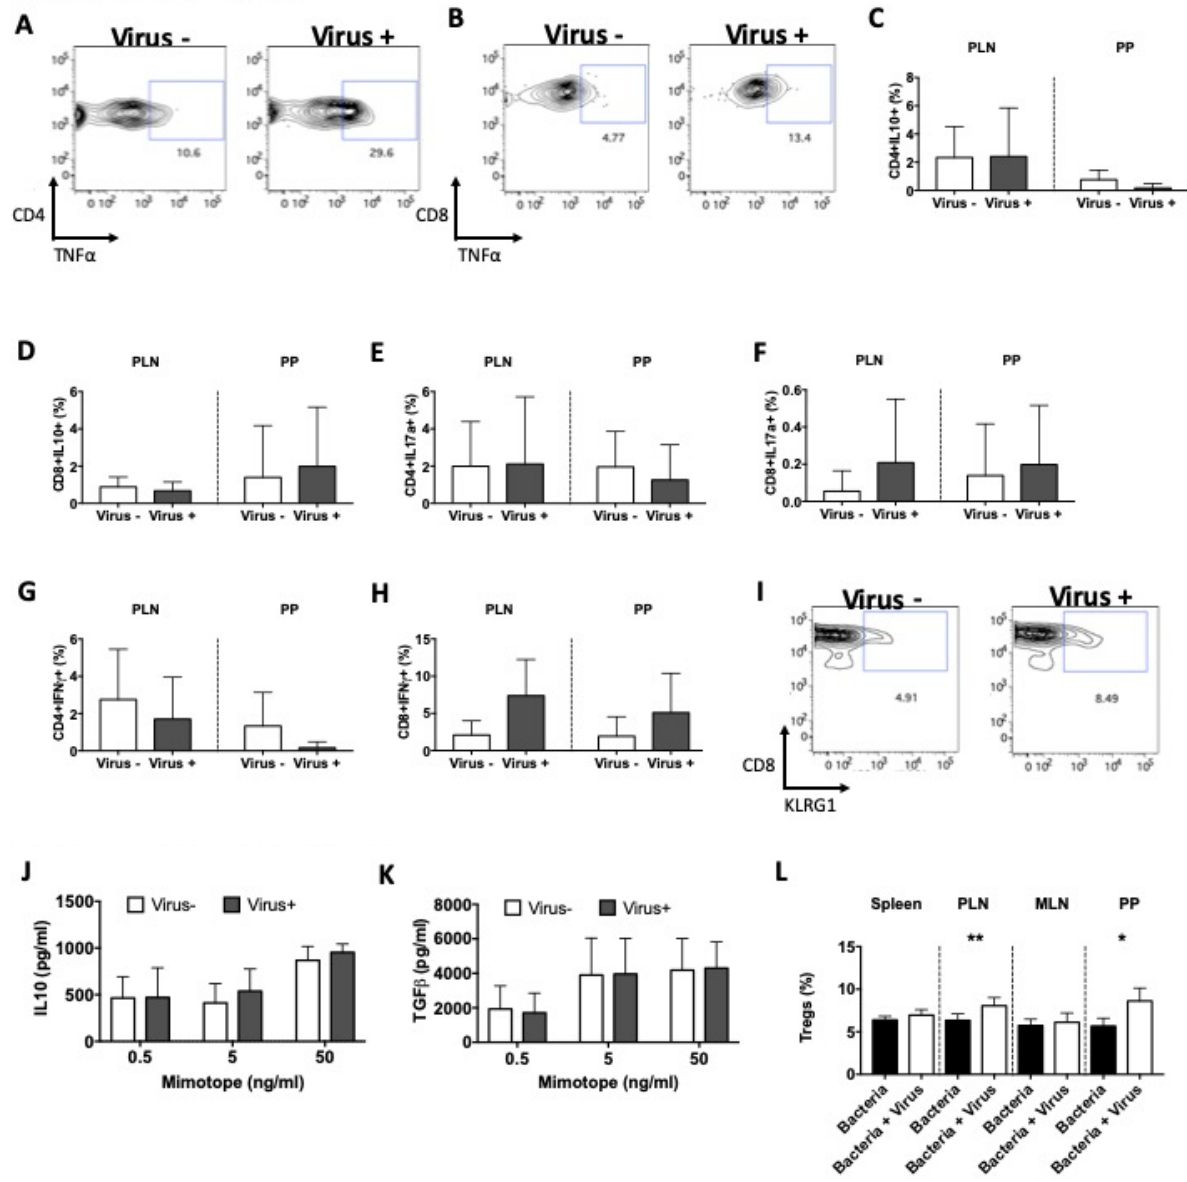

Supplement: Image_9.pdf [file Image_9.pdf]
